# Supplementary material for: Structural Variation-Associated Expression Changes Are Paralleled by Chromatin Architecture Modifications
Source: PLOS journal article supplement (doi:10.1371/journal.pone.0079973), 2013-11-12

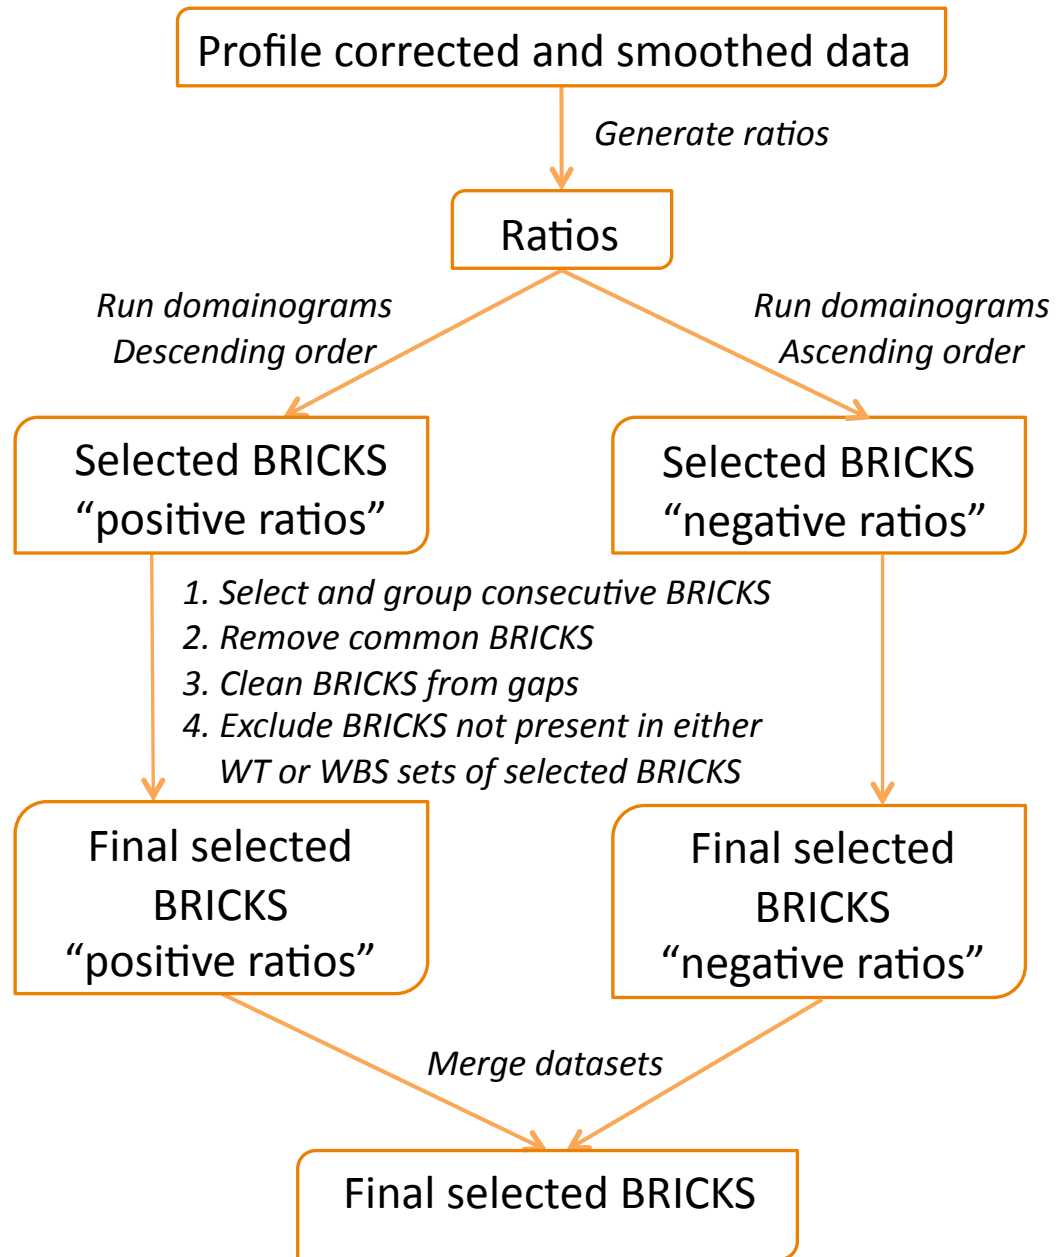

Supplement: S2 (10.1371/journal.pone.0079973.s002) [file journal.pone.0079973.s002]
